# Supplementary material for: Hole-doping-induced half-metallic ferromagnetism in a highly-air-stable PdSe2 monolayer under uniaxial stress
Source: Royal Society of Chemistry journal article supplement (doi:10.1039/c8tc01450g), 2018-01-01
Supplement: c8tc01450g1.pdf [file c8tc01450g1.pdf]

**Supplementary Information for  
Hole-doping-induced half-metallic ferromagnetism in highly-air-stable PdSe<sub>2</sub>  
monolayer under uniaxial stress**

Shi-Hao Zhang<sup>1,2</sup> and Bang-Gui Liu<sup>1,2,\*</sup>

<sup>1</sup>*Beijing National Laboratory for Condensed Matter Physics,*

*Institute of Physics, Chinese Academy of Sciences, Beijing 100190, China*

<sup>2</sup>*School of Physical Sciences, University of Chinese Academy of Sciences, Beijing 100190, China*

(Dated: May 16, 2018)

---

\* bgliu@iphy.ac.cn

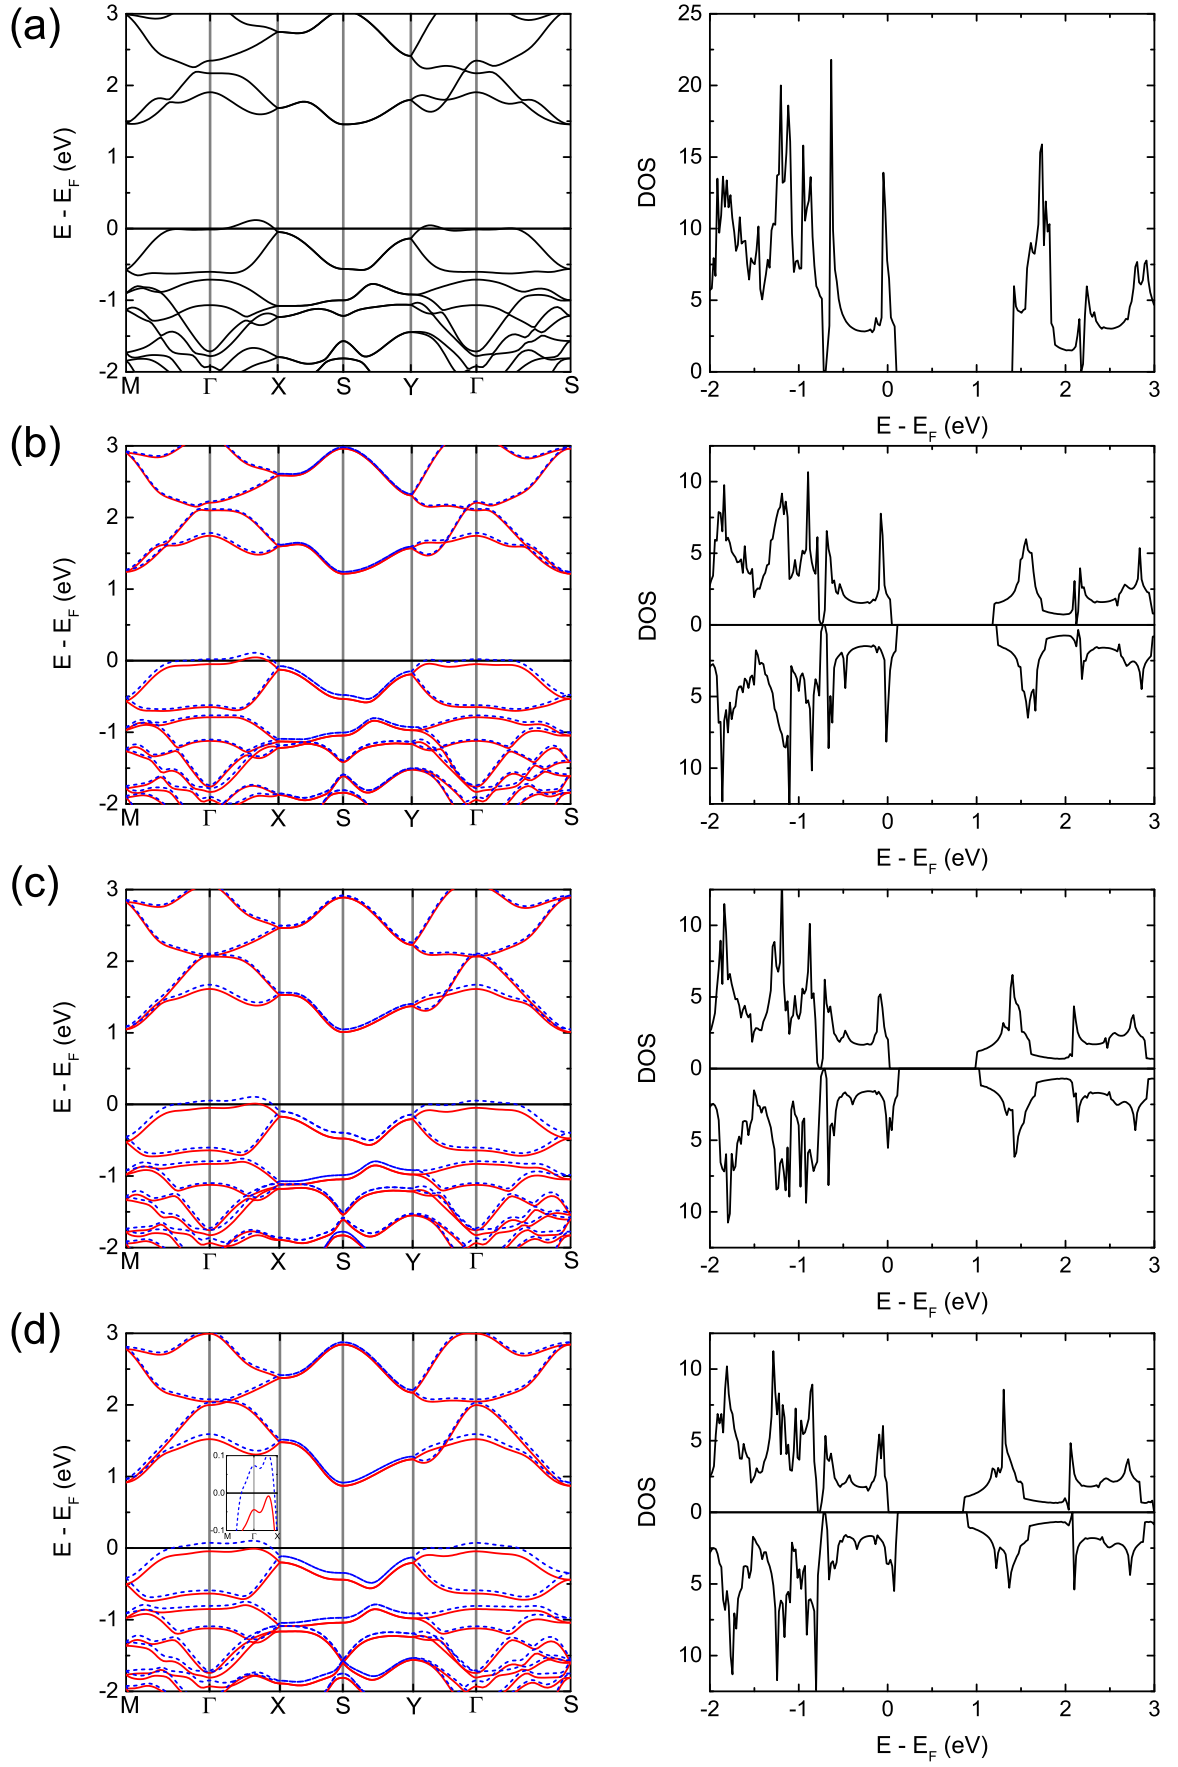

FIG. 1. The energy bands and density of states (DOS) of the monolayer with 0.2 holes per formula unit under the strain values of 0% (a), 3% (b), 6% (c) and 8% (d).
